# Supplementary material for: Dynamic enhancement in adhesion forces of truncated and nanosphere tips on substrates
Source: Royal Society of Chemistry journal article supplement (doi:10.1039/c5ra16887b), 2015-01-01
Supplement: c5ra16887b1.pdf [file c5ra16887b1.pdf]

## **Dynamic enhancement in adhesion forces of truncated and nanosphere tips on substrates**

Hongjun Zhou<sup>a, †</sup>, Quan Xu<sup>a, †</sup>, Shaowei Li<sup>a, †</sup>, Yanjun Zheng<sup>a</sup>, Xu Wu<sup>a</sup>, Chaokang Gu<sup>c</sup>, Yusheng Chen<sup>d</sup>, Jian Zhong<sup>b, \*</sup>

<sup>a</sup> State Key Laboratory of Heavy Oil Processing, China University of Petroleum (Beijing), 102249, China

<sup>b</sup> College of Food Science & Technology, Shanghai Ocean University, Shanghai 201306, China

<sup>c</sup> EnerVault Corporation, 1244 Reamwood avenue, Sunnyvale, California, 94089, USA

<sup>d</sup> Department of Chemistry, University of Akron, Akron 44325, USA

<sup>†</sup> These authors contributed equally to this work.

\*Corresponding authors: Jian Zhong

Jian Zhong, College of Food Science & Technology, Shanghai Ocean University, Shanghai 201306, China; E-mail: [jzhong@shou.edu.cn](mailto:jzhong@shou.edu.cn), [jianzhongpku@hotmail.com](mailto:jianzhongpku@hotmail.com).

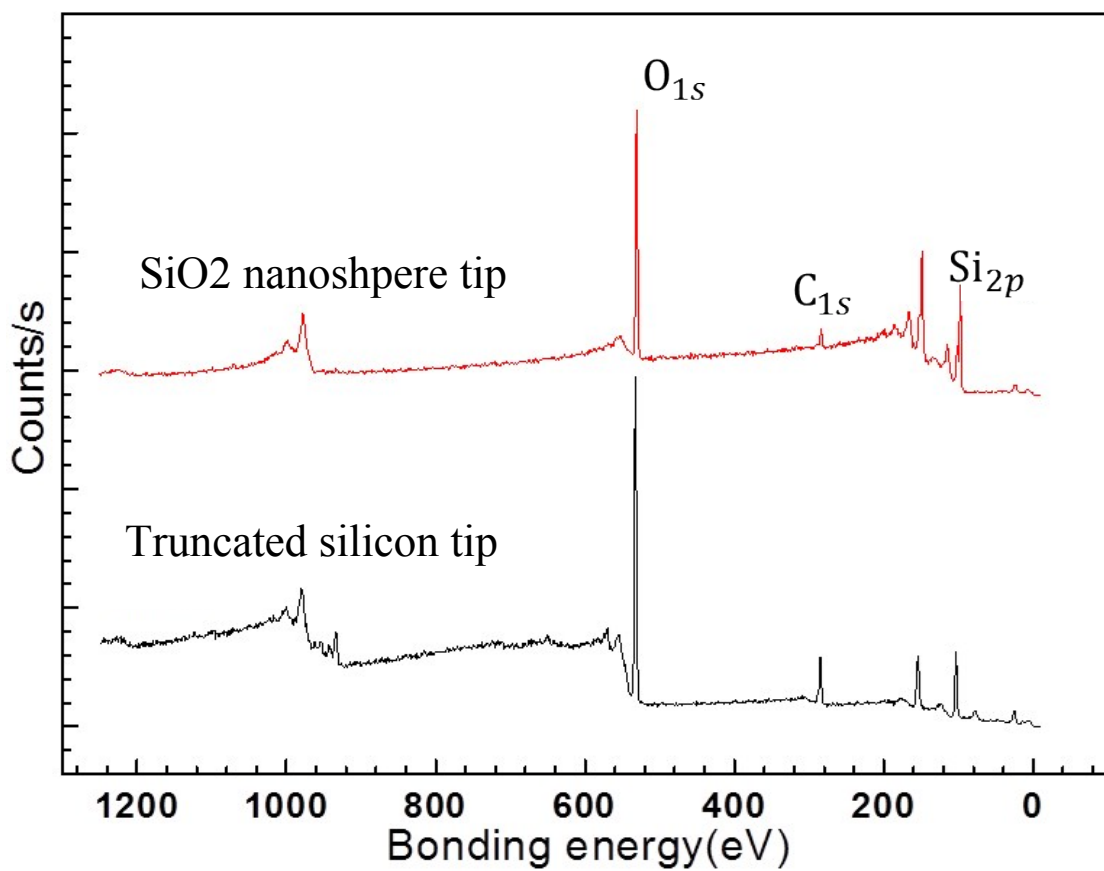

Figure S1: XPS spectra of AFM tips. Red line (top line) is obtained from the SiO<sub>2</sub> nanosphere tip. Black line (bottom line) is obtained from truncated silicon tip.
